# Supplementary material for: Identify kinetic features of fibers growing, branching, and bundling in microstructure engineering of crystalline fiber network
Source: Royal Society of Chemistry journal article supplement (doi:10.1039/c4ce00096j), 2014-01-01
Supplement: c4ce00096j1.pdf [file c4ce00096j1.pdf]

## **Identify Kinetic Features of Fibers Growing, Branching, and Bundling in Microstructure Engineering of Crystalline Fiber Network**

**Yu Liu,<sup>a</sup> Rong-Yao Wang,<sup>a,\*</sup> Jing-Liang Li,<sup>b,c</sup> Bing Yuan,<sup>d</sup> Min Han,<sup>a</sup> Peng Wang,<sup>a</sup> Xiang-Yang Liu<sup>b</sup>**

<sup>a</sup> School of Physics, Key Laboratory of Cluster Science of Ministry of Education, Beijing Institute of Technology, Beijing, China, 100081 . Email: [wangry@bit.edu.cn](mailto:wangry@bit.edu.cn)

<sup>b</sup> Department of physics, National University of Singapore, 2 Science Drive 3, Singapore 1175423

<sup>c</sup> Institute for Frontier Materials, Deakin University, Waurn Ponds, Victoria, Australia 3216

<sup>d</sup> Center for Soft Condensed Matter Physics and Interdisciplinary Research, Soochow University, Suzhou, P. R. China 215006

## 1. The protocol of thermal control used for the spherulitic domains network and interconnected fibers network

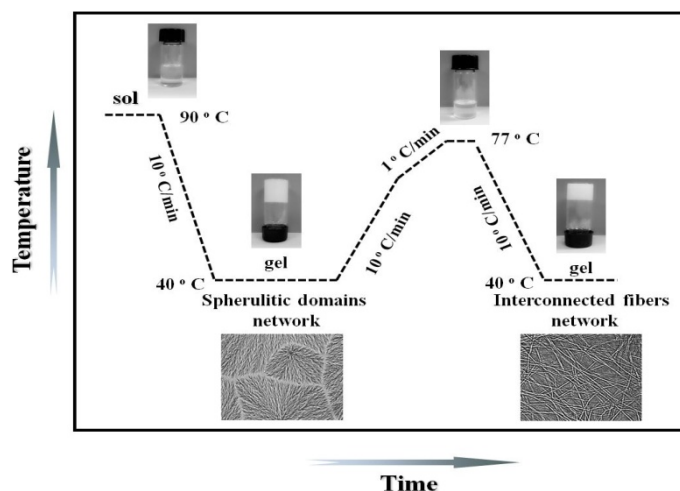

**Fig. S1** The protocol of thermal control used for the fiber network formation in GP-1/PG gels.

## 2. X-ray diffraction spectra

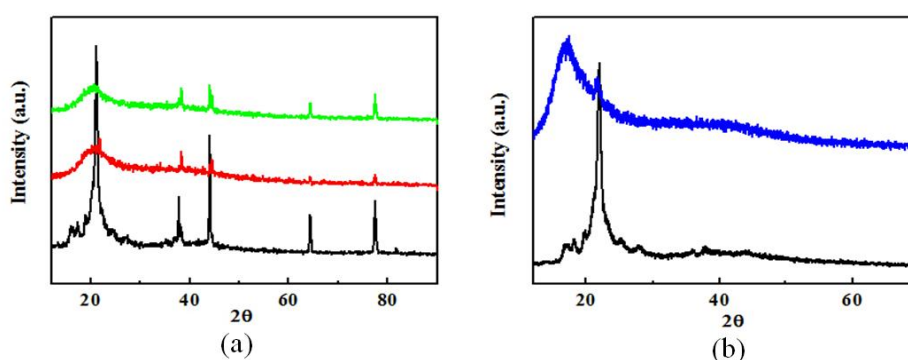

**Fig. S2** XRD spectra (a) GP-1 powder (Wako Pure Chemical Industries, Ltd, black line), the interconnected fibers network of GP-1/PG (red line), and the spherulitic domains network of GP-1/PG (green line), (b) for GP-1 powder (Kishimoto Sangyo Asia, black line), the interconnected fibers network of GP-1/ISA (blue line).

## 3. Kinetic analysis of spherulitic domains network and interconnected fibers network of GP-1/PG system

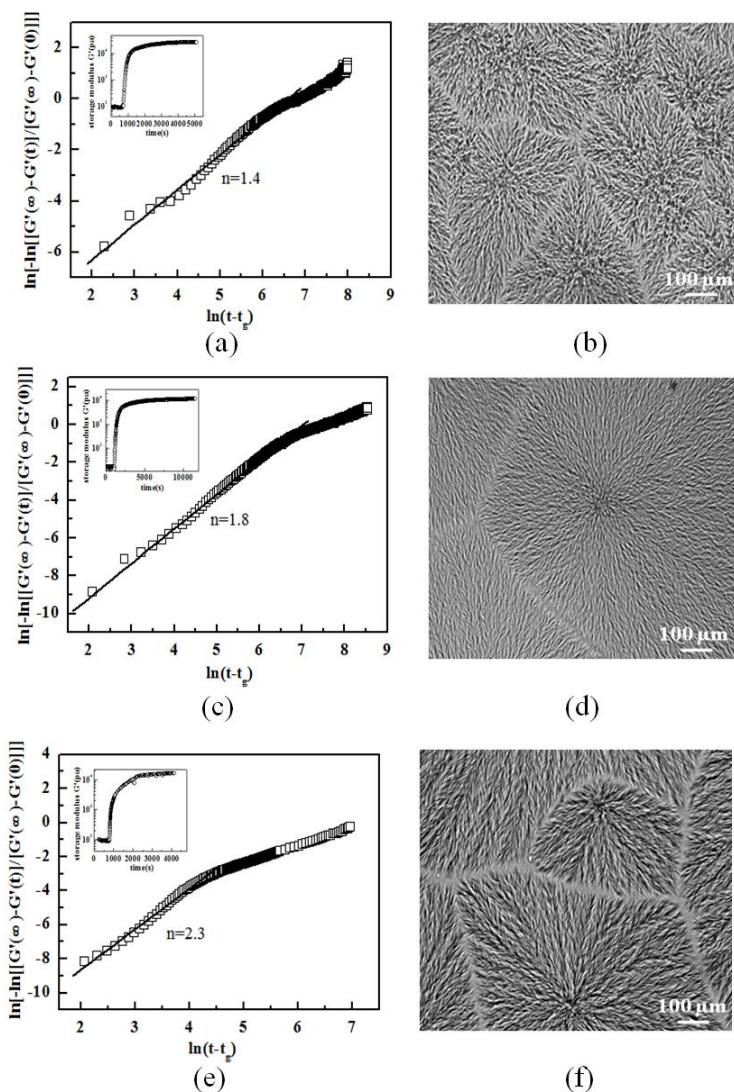

**Fig. S3** The Avrami plots of dynamic rheological data according to eqn (5) for GP-1/PG systems at different temperatures and concentrations. Inset: Evolution of storage modulus in the process of sol-to-gel transition. (a) 3wt % GP-1/PG system at 30°C; (c) 3wt % GP-1/PG system at 50°C; (e) 4wt % GP-1/PG system at 40°C. (b), (d) and (f) are the corresponding optical micrographs.

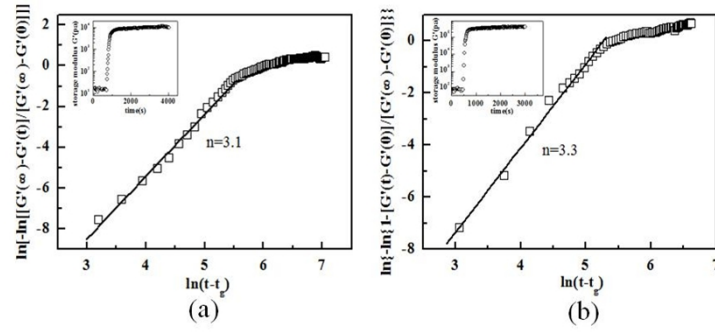

**Fig. S4** The Avrami plots of dynamic rheological data according to eqn (5) for the formations of the interconnected fiber network from GP-1/PG system at 50 °C: (a) 3 wt %; (b) 5 wt %. Inset: Evolution of storage modulus in the process of sol-to-gel transition.

#### 4. Rheological properties of spherulitic domains network and interconnected fibers network of GP-1/PG system

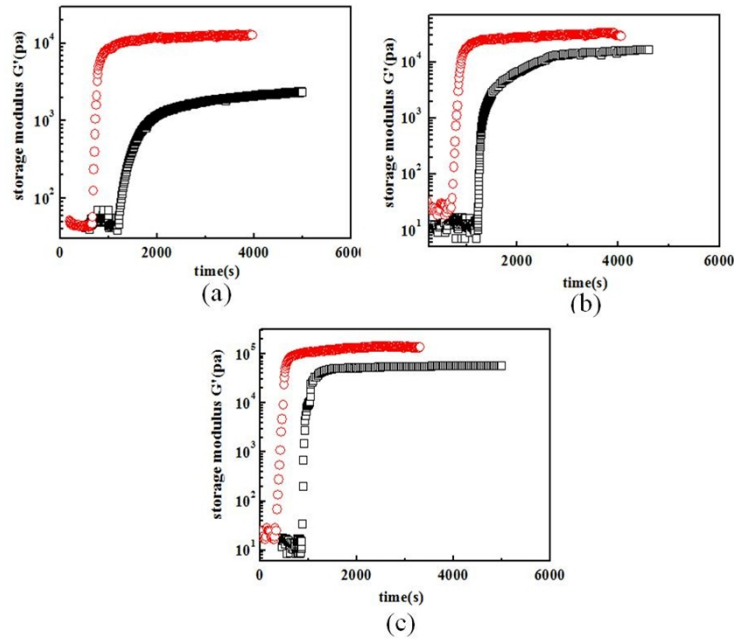

**Fig. S5** Evolution of storage modulus acquired during the gelation process of GP-1/PG system at 50°C: (a) 3wt %; (b) 4wt %; (c) 5wt %. □: spherulitic domains network and ○: interconnected fibers network

## 5. Kinetic analysis of spherulitic domains network and interconnected fibers network of GP-1/ISA system

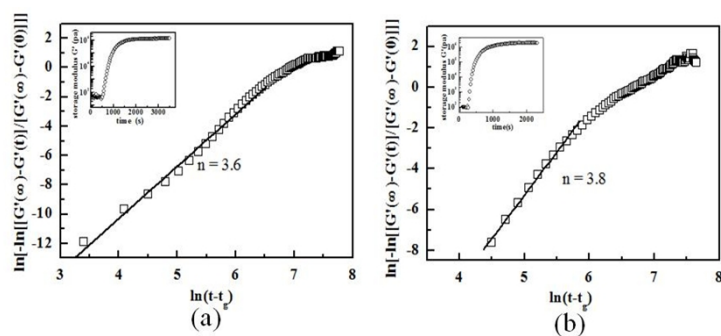

**Fig. S6** The Avrami plots of dynamic rheological data according to eqn (5) for the formations of the interconnected fiber network from GP-1/ISA system at 15°C: (a) 5 wt %; (b) 6 wt %. Inset: Evolution of storage modulus in the process of sol-to-gel transition.
